# Supplementary material
Source: PubMed Central journal article supplement (PMC6891195)
Supplement: NIHMS1540206-supplement-1.pdf [file NIHMS1540206-supplement-1.pdf]

**SUPPLEMENTARY TABLES**

**TRABECTEDIN REVEALS A STRATEGY OF IMMUNOMODULATION IN  
CHRONIC LYMPHOCYTIC LEUKEMIA**

Banerjee *et al.*

- Supplementary Table S1. Clinical and biological features of CLL patients from San Raffaele Hospital
- Supplementary Table S2. Clinical and biological features of CLL patients from MDACC
- Supplementary Table S3. List of anti-human antibodies used for flow cytometry, myeloid cell panel
- Supplementary Table S4. List of anti-human antibodies used for flow cytometry, lymphoid cell panel
- Supplementary Table S5. List of anti-human antibodies used for flow cytometry intracellular cytokine detection on human myeloid cells
- Supplementary Table S6. List of anti-human antibodies used for flow cytometry phagocytosis assay on human monocytes and macrophages
- Supplementary Table S7. List of anti-human antibodies used for flow cytometry checkpoint and intracellular cytokine detection on human lymphocytes
- Supplementary Table S8. Primers for qRT-PCR analysis
- Supplementary Table S9. List of anti-murine antibodies used for flow cytometry, myeloid cell panel
- Supplementary Table S10. List of anti-murine antibodies used for flow cytometry, lymphoid cell panel
- Supplementary Table S11. Comparisons between human myeloid and lymphoid cells in depletion studies
- Supplementary Table S12. Comparisons between human myeloid and lymphoid cells in depletion studies

**Supplementary Table S1. Clinical and biological features of CLL patients from San Raffaele Hospital, Milan, Italy**

| Patient no. | Age (yr) | RAI stage* | BINET Stage* | Clinical course | HC  | LC  | CD38 (%)† | ZAP70 %† | IGHV MS | FISH      |
|-------------|----------|------------|--------------|-----------------|-----|-----|-----------|----------|---------|-----------|
| 1           | 57       | I          | B            | Progressive     | MD  | Neg | 0.1       | 32.4     | M       | Del(13q)  |
| 2           | 62       | 0          | A            | Progressive     | MD  | Neg | 24.8      | NA       | U       | Del(13q)  |
| 3           | 63       | II         | A            | Stable          | NA  | NA  | NA        | NA       | NA      | Trisomy12 |
| 4           | 66       | 0          | A            | Progressive     | Neg | L   | 0         | NA       | M       | NA        |
| 5           | 88       | 0          | A            | Stable          | MD  | K   | 32.7      | 35.01    | U       | Normal    |
| 6           | 80       | 0          | A            | Stable          | A   | neg | 0.2       | 16.2     | M       | Del(13q)  |
| 7           | 43       | 0          | A            | Stable          | Neg | Neg | 0.2       | NA       | NA      | Normal    |
| 8           | 79       | 0          | A            | Stable          | D   | neg | 0.1       | NA       | NA      | Del(13q)  |
| 9           | 78       | 0          | A            | Stable          | M   | neg | 0.2       | NA       | M       | NA        |
| 10          | 78       | 0          | A            | Stable          | D   | neg | 0.1       | NA       | NA      | NA        |
| 11          | 78       | 0          | A            | Stable          | M   | κ   | 0.1       | NA       | U       | NA        |
| 12          | 50       | N/A        | N/A          | Stable          | neg | λ   | 11        | NA       | NA      | Normal    |

Abbreviations: HC, heavy chain; LC, light chain; IGHV MS, immunoglobulin heavy chain variable mutation status (M, mutated; U: unmutated); FISH, fluorescence *in situ* hybridization; D, IgD surface expression; M, IgM surface expression; MD, IgM/IgD surface expression; NA, not available

\* Determined at diagnosis

† Determined by flow cytometry

**Supplementary Table S2. Clinical and biological features of CLL patients from MD Anderson Cancer Center**

| Patient no. | Age (yr) | Sex | WBC   | Treatment | ZAP70 %† | IGHV MS | FISH                 |
|-------------|----------|-----|-------|-----------|----------|---------|----------------------|
| 13          | 76       | M   | 33.5  | PRIOR RX  | NEG      | M       | Trisomy12 & Del(13q) |
| 14          | 81       | F   | 62.1  | PRIOR RX  | NA       | M       | Del(13q)             |
| 15          | 63       | M   | 20.5  | UNT       | NA       | U       | Trisomy12            |
| 16          | 61       | M   | 11.9  | UNT       | NEG      | M       | Trisomy12            |
| 17          | 68       | M   | 24.2  | UNT       | NEG      | M       | Trisomy12            |
| 18          | 67       | M   | 35.9  | UNT       | NEG      | M       | Del(13q)             |
| 19          | 39       | M   | 38.9  | UNT       | NEG      | M       | Del(13q)             |
| 20          | 67       | F   | 8.4   | PRIOR RX  | NEG      | M       | Del(13q)             |
| 21          | 65       | M   | 54.7  | UNT       | NEG      | M       | Del(13q)             |
| 22          | 78       | F   | 65.4  | PRIOR RX  | NA       | M       | NA                   |
| 23          | 87       | F   | 11.2  | UNT       | NA       | NA      | NEG                  |
| 24          | 72       | M   | 45.9  | PRIOR RX  | POS      | M       | NEG                  |
| 25          | 51       | M   | 54.6  | UNT       | NEG      | NA      | NEG                  |
| 26          | 81       | M   | 57.5  | UNT       | POS      | NA      | Del(13q)             |
| 173         | 81       | M   | 67.1  | PRIOR RX  | NEG      | M       | NEG                  |
| 915         | 69       | M   | 24.7  | UNT       | NEG      | U       | Trisomy12            |
| 665         | 49       | F   | 19.7  | UNT       | NEG      | M       | NEG                  |
| 538         | 59       | M   | 32.9  | UNT       | POS      | NA      | Del(13q)             |
| 089         | 70       | M   | 57.8  | PRIOR RX  | NA       | NA      | NEG                  |
| 642         | 73       | M   | 27.7  | UNT       | NEG      | NA      | Trisomy12            |
| 33          | 66       | M   | 70.5  | PRIOR RX  | POS      | M       | Del(13q)             |
| 34          | 56       | M   | 58.8  | UNT       | POS      | U       | Del(13q) & Del (11q) |
| 35          | 52       | M   | 78.7  | UNT       | NEG      | NA      | NEG                  |
| 36          | 75       | M   | 87.2  | UNT       | NA       | U       | Del(11q)             |
| 37          | 82       | M   | 51.6  | PRIOR RX  | POS      | NA      | Del(13q)             |
| 38          | 70       | M   | 10.3  | PRIOR RX  | NEG      | M       | Del(13q)             |
| 39          | 66       | F   | 119.6 | PRIOR RX  | NEG      | U       | Del(17p)             |
| 40*         | 58       | M   | 3.3   | PRIOR RX  | NA       | NA      | Del(17p)             |
| 41*         | 69       | M   | 4.1   | PRIOR RX  | NA       | NA      | Del(13q)             |
| 42          | 60       | M   | 21.7  | UNT       | NEG      | M       | NEG                  |
| 43          | 70       | M   | 7.6   | PRIOR RX  | NA       | NA      | NA                   |
| 44*         | 82       | M   | 53.3  | UNT       | POS      | NA      | Del(13q)             |
| 45*         | 73       | M   | 45.4  | PRIOR RX  | POS      | U       | Del(13q)             |
| 46          | 79       | F   | 60.5  | PRIOR RX  | NEG      | NA      | NEG                  |
| 47          | 65       | M   | 28    | UNT       | NA       | M       | Del(13q)             |
| 48          | 75       | F   | 19.3  | UNT       | NEG      | M       | Del(17p) & Del(13q)  |
| 49          | 89       | F   | 27.2  | UNT       | NEG      | M       | Del(13q)             |

Abbreviations and notes: WBC, white blood cell count; IGHV MS, immunoglobulin heavy chain variable mutation status (M, mutated; U: unmutated); FISH, fluorescence *in situ* hybridization; PRIOR RX, prior therapies; NA, not available

\*Patient 40 had Richter's syndrome, resistant to ibrutinib, venetoclax; patient 41 had CLL and sarcoma; intolerant to ibrutinib, venetoclax; patient 44 had CLL and multiple skin cancers; patient 45 had CLL in relapse

† Determined by flow cytometry

**Supplementary Table S3. List of anti-human antibodies used for flow cytometry, myeloid cell panel**

| <b>Antibody</b>                              | <b>Fluorochrome</b>  | <b>Clone</b>               | <b>Company</b> |
|----------------------------------------------|----------------------|----------------------------|----------------|
| hCD16                                        | BUV 737              | 3G8                        | BD Biosciences |
| hCD14                                        | Brilliant Violet 786 | MφP9                       | BD Biosciences |
| hCD45                                        | Brilliant Violet 711 | HI30                       | BioLegend      |
| hCD11b                                       | BUV 395              | ICRF44                     | BD Biosciences |
| hHLA DR                                      | APC-CY7              | L243                       | BioLegend      |
| hCSF1R                                       | PE                   | 12-3A3-8E6                 | eBioscience    |
| Lineage Cocktail<br>(hCD3/hCD19/hCD20/hCD56) | APC                  | UCHTI/HIB19,<br>2H7/5.1H11 | BioLegend      |
| hCD66b                                       | AlexaFluor 700       | G10F5                      | BioLegend      |

**Supplementary Table S4. List of anti-human antibodies used for flow cytometry, lymphoid cell panel**

| <b>Antibody</b> | <b>Fluorochrome</b>  | <b>Clone</b> | <b>Company</b>  |
|-----------------|----------------------|--------------|-----------------|
| hCD8a           | eFluor 450           | SK1          | eBioscience     |
| hCD45RO         | BUV 395              | UCHL1        | BD Biosciences  |
| hCD45RA         | PE-Cy7               | L48          | BD Biosciences  |
| hCD62L          | Brilliant Violet 605 | DREG-56      | BioLegend       |
| hCD4            | PE-Dazzle 594        | SK3          | BioLegend       |
| hCD25           | PE                   | 4E3          | Miltenyi Biotec |
| hFoxp3          | APC                  | 3G3          | Miltenyi Biotec |
| hCD19           | PE-Cy5.5             | J3-119       | Beckman Coulter |
| hCD20           | Alexa Fluor 700      | B9E9         | Beckman Coulter |
| hCD5            | APC-Alexa 750        | BL1a         | Beckman Coulter |
| hCD23           | FITC                 | TU1          | Thermo Fisher   |

**Supplementary Table S5. List of anti-human antibodies used for flow cytometry intracellular cytokine detection on human myeloid cells**

| <b>Antibody</b>                          | <b>Fluorochrome</b>  | <b>Clone</b>                 | <b>Company</b>  |
|------------------------------------------|----------------------|------------------------------|-----------------|
| hIFN $\alpha$                            | FITC                 | LT27:295                     | Miltenyi Biotec |
| hTNF $\alpha$                            | Brilliant Violet 650 | MAb11                        | BioLegend       |
| hIL-6                                    | PE-CF594             | MQ2-13A5                     | BD Biosciences  |
| hIL-12                                   | PE- Vio770           | REA121                       | Miltenyi Biotec |
| hCCL2                                    | PerCP                | 2D8                          | Novus           |
| hTRAILR2                                 | PE                   | DJR2-4 (7-8)                 | BioLegend       |
| hCD14                                    | Brilliant Violet 786 | M $\phi$ P9                  | BD Biosciences  |
| hCD16                                    | BUV737               | 3G8                          | BD Biosciences  |
| hCD45                                    | Brilliant Violet 711 | HI30                         | BioLegend       |
| hHLA DR                                  | APC- Cy7             | L243                         | BioLegend       |
| Lineage Cocktail<br>(CD3/CD19/CD20/CD56) | APC                  | UCHT1, HIB19, 2H7,<br>5.1H11 | BioLegend       |
| hCD66b                                   | Alexa Fluor 700      | G10F5                        | BioLegend       |

**Supplementary Table S6. List of anti-human antibodies used for flow cytometry-based phagocytosis assay of human monocytes and macrophages**

| <b>Antibody/Dye</b>                          | <b>Fluorochrome</b>  | <b>Clone</b>               | <b>Company</b> |
|----------------------------------------------|----------------------|----------------------------|----------------|
| hCD16                                        | BUV 737              | 3G8                        | BD Biosciences |
| hCD14                                        | Brilliant Violet 786 | MφP9                       | BD Biosciences |
| Calcein Violet-AM<br>Proliferation Dye (VPD) |                      |                            | BioLegend      |
| hCD68                                        | PE                   | Y1/82A                     | BioLegend      |
| hHLA DR                                      | APC-CY7              | L243                       | BioLegend      |
| Lineage Cocktail<br>(hCD3/hCD19/hCD20/hCD56) | APC                  | UCHL1/HIB19,<br>2H7/5.1H11 | BioLegend      |
| hCD66b                                       | AlexaFluor 700       | G10F5                      | BioLegend      |



**Supplementary Table S7. List of anti-human antibodies used for flow cytometry checkpoint and intracellular cytokine detection on human lymphocytes**

| <b>Antibody</b> | <b>Fluorochrome</b>  | <b>Clone</b> | <b>Company</b>  |
|-----------------|----------------------|--------------|-----------------|
| hCD8a           | eFluor 450           | SK1          | eBioscience     |
| hCD45RO         | BUV 395              | UCHL1        | BD Biosciences  |
| hCD45RA         | PE-Cy7               | L48          | BD Biosciences  |
| hCD62L          | Brilliant Violet 605 | DREG-56      | BioLegend       |
| hCD19           | PE-Cy5.5             | J3-119       | Beckman Coulter |
| hGRANZYME B     | Alexa Fluor 700      | GB11         | BD Biosciences  |
| hPD-1           | Brilliant Violet 650 | EH12.2H7     | BioLegend       |
| hCD5            | APC-Alexa 750        | BL1a         | Beckman Coulter |
| hIFN $\gamma$   | FITC                 | 25723.11     | BD Biosciences  |

**Supplementary Table S8. Primers for qRT-PCR analysis**

| <b>HUMAN</b>                    |                              |                                |
|---------------------------------|------------------------------|--------------------------------|
| <b>GENE</b>                     | <b>FORWARD</b>               | <b>REVERSE</b>                 |
| <i>CCL2</i>                     | 5'-AGTCTCTGCCGCCCTTCT-3'     | 5'-GTGACTGGGGCATTGATTG-3'      |
| <i>IL10</i>                     | 5'-GATGCCTTCAGCAGAGTGAA-3'   | 5'-GCAACCCAGGTAACCCCTTAAA-3'   |
| <i>IFN-<math>\alpha</math></i>  | 5'-GACTCCATCTTGGCTGTGA-3'    | 5'-TGATTTCTGCTCTGACAACCT-3'    |
| <i>TNF-<math>\alpha</math></i>  | 5'-TCCTTCAGACACCCTCAACC-3'   | 5'-CAGGGATCAAAGCTGTAGGC-3'     |
| <i>IL12A</i>                    | 5'-CTTTTATGATGGCCCTGTGC-3'   | 5'-TCAAGGGAGGATTTTTGTGG-3'     |
| <i>IL6</i>                      | 5'-TACCCCCAGGAGAAGATTCC-3'   | 5'-CCATCTTTGGAAGGTTCAAG-3'     |
| <i>TGF-<math>\beta</math></i>   | 5'-CCCAGCATCTGCAAAGCTC-3'    | 5'-GTCAATGTACAGCTGCCGCA-3'     |
| <i>IFN-<math>\gamma</math></i>  | 5'-TGACCAGAGCATCCAAAAGA-3'   | 5'-CTCTTCGACCTCGAAACAGC-3'     |
| <i>GZMB</i>                     | 5'-CCCTGGGAAAACACTCACACA-3'  | 5'-CACAACCTCAATGGTACTGTCGT-3'  |
| <i>FOXP3</i>                    | 5'-CCCACTTACAGGCACTCCTC-3'   | 5'-CTTCTCCTTCTCCAGCACCA-3'     |
| <i>TRAIL-R2</i>                 | 5'-AGACCCTTGTGCTCGTTGTC-3'   | 5'-TTGTTGGGTGATCAGAGCAG-3'     |
| <i>TNFR1</i>                    | 5'-TGCTCCAAATGCCGAAAG-3'     | 5'-AATGCCGGTACTGGTTCTTC-3'     |
| <i>FAS</i>                      | 5'-ATGGCCAATTCTGCCATAAG-3'   | 5'-TGACTGTGCAGTCCCTAGCTT-3'    |
| <i>FASL</i>                     | 5'-TGGGGATGTTTCAGCTCTTC-3'   | 5'-TGTGCATCTGGCTGGTAGAC-3'     |
| <i>FADD</i>                     | 5'-CCGAGCTCAAGTTCCTATGC-3'   | 5'-AGGTCTAGGCCGCTCTGC-3'       |
| <i>CASP 8</i>                   | 5'-CAGCAGCCTTGAAGGAAGTC-3'   | 5'-CGAGATTGTCATTACCCCAACA-3'   |
| <i>CASP 3</i>                   | 5'-TTGTGGAATTGATGCGTGAT-3'   | 5'-GGCTCAGAAGCACACAAACA-3'     |
| <i>CASP 9</i>                   | 5'-AAGCCCAAGCTCTTTTTCATC-3'  | 5'-ACTCGTCTTCAGGGGAAGTG-3'     |
| <i>BAX</i>                      | 5'-CAAGACCAGGGTGGTTGG-3'     | 5'-CACTCCCGCCACAAAGAT-3'       |
| <i>BID</i>                      | 5'-GTGCTGGGGTCATGATGG-3'     | 5'-CGACTCACTCCTGGTTCACA-3'     |
| <i>MCL1</i>                     | 5'-AAGCCAATGGGCAGGTCT-3'     | 5'-GAACTCCACAAACCCATCCTT-3'    |
| <i><math>\beta</math>-ACTIN</i> | 5'-ACCGAGCGCGGCTACAG-3'      | 5'-CTTAATGTCACGCACGATTTC-3'    |
| <i>ERCC6</i>                    | 5'-GCAGAAGAAAGTGCCA-3'       | 5'-CATTACCTAAGATATGTGAAAGAG-3' |
| <i>ERCC6L</i>                   | 5'-TATTCCATCTCCTTAACCG-3'    | 5'-TCATCATCTCCCTGTTCT-3'       |
| <i>ERCC8</i>                    | 5'-TTCTACAGGGTCACAGAC-3'     | 5'-CCCATTATGTTGATCAAGAG-3'     |
| <i>XAB2</i>                     | 5'-ATGCACAAGATGCCTCGT-3'     | 5'-AATTCGAGAGTGCTGCGT-3'       |
| <i>RAD51</i>                    | 5'-CCTGCTTGGTCTTTCATTGCTA-3' | 5'-CACACTGGCCTGAAATGCTTT-3'    |
| <i>RAD51B</i>                   | 5'-GGATATGGGTTCTGGGCTTTAG-3' | 5'-GTGAGGCAGGCCATAGTATTT-3'    |
| <i>RAD51D</i>                   | 5'-GGGAGCTTCAGCGTACTAATG-3'  | 5'-CCAGATTCCAGCAACACAAATG-3'   |

**Supplementary Table S9. List of anti-murine antibodies used for flow cytometry, myeloid cell panel**

| <b>Antibody</b>  | <b>Fluorochrome</b>  | <b>Clone</b> | <b>Company</b> |
|------------------|----------------------|--------------|----------------|
| mCD45            | BUV 395              | 30-F11       | BD Biosciences |
| mCD11b           | Brilliant Violet 750 | M1/70        | BioLegend      |
| mCD206           | FITC                 | MR5D3        | BioLegend      |
| mF4/80           | PE-CY7               | BM8          | BioLegend      |
| mLy6C            | APC-CY7              | HK1.4        | BioLegend      |
| mLy6G            | PerCP                | 1A8          | BioLegend      |
| mCSF1R           | PE                   | 604B5 2E11   | Bio-Rad        |
| mIA <sup>b</sup> | eFluor 450           | AF6-120.1    | eBioscience    |
| mCD169           | APC                  | 3D6.112      | BioLegend      |
| mPD-L1           | AlexaFluor 700       | MIH5         | Novus          |

**Supplementary Table S10. List of anti-murine antibodies used for flow cytometry, lymphoid cell panel**

| <b>Antibody</b> | <b>Fluorochrome</b>  | <b>Clone</b> | <b>Company</b> |
|-----------------|----------------------|--------------|----------------|
| mCD62L          | BUV 395              | MEL-14       | BD Biosciences |
| mCD4            | Brilliant Violet 650 | GK1.5        | BD Biosciences |
| mKappa          | FITC                 | 187.1        | BD Biosciences |
| mCD19           | PE-CY7               | 1D3          | BD Biosciences |
| mCD3 $\epsilon$ | APC-CY7              | 145-2C11     | BioLegend      |
| mCD8a           | PerCP                | 53-6.7       | BioLegend      |
| mLambda         | PE                   | JC5-1        | Thermo Fisher  |
| mPD-1           | eFluor 450           | RMP1-30      | eBioscience    |
| mCD5            | APC                  | 53-7.3       | BD Biosciences |
| mPD-L1          | AlexaFluor 700       | MIH5         | Novus          |
| mCD44           | BUV737               | IM7          | BD Biosciences |
| mCD25           | Brilliant Violet 786 | PC61         | BD Biosciences |
| mCD45           | Brilliant Violet 711 | 30-F11       | BioLegend      |

## Supplementary Table S11. Comparisons between human myeloid and lymphoid cells in depletion studies

| Comparison A vs B                                                                          | Method   | p-value | Expr A | Expr B | FDR    |
|--------------------------------------------------------------------------------------------|----------|---------|--------|--------|--------|
| CD19 <sup>+</sup> vs CD19 <sup>+</sup> CD5 <sup>+</sup>                                    | t-test   | 0.1934  | 16.6   | 26.59  | 0.3113 |
| CD19 <sup>+</sup> vs Intermediate                                                          | t-test   | 0.0533  | 16.6   | 43.02  | 0.1067 |
| CD19 <sup>+</sup> vs Foxp3 <sup>+</sup> Treg                                               | t-test   | 0.0092  | 16.6   | 55     | 0.0494 |
| CD19 <sup>+</sup> CD5 <sup>+</sup> vs Intermediate                                         | t-test   | 0.2273  | 26.59  | 43.02  | 0.3469 |
| CD19 <sup>+</sup> CD5 <sup>+</sup> vs Foxp3 <sup>+</sup> Treg                              | t-test   | 0.0469  | 26.59  | 55     | 0.0999 |
| Intermediate vs Foxp3 <sup>+</sup> Treg                                                    | t-test   | 0.4713  | 43.02  | 55     | 0.6100 |
| CD19 <sup>+</sup> vs CD19 <sup>+</sup> CD5 <sup>+</sup> CD23 <sup>+</sup>                  | MWW-test | 0.9694  | 13.15  | 13.1   | 0.9845 |
| CD19 <sup>+</sup> vs CD8 <sup>+</sup>                                                      | MWW-test | 0.0433  | 13.15  | 0      | 0.0952 |
| CD19 <sup>+</sup> vs Classical                                                             | MWW-test | 0.0116  | 13.15  | 0      | 0.0511 |
| CD19 <sup>+</sup> vs M-MDSC                                                                | MWW-test | 0.5693  | 13.15  | 13.41  | 0.7089 |
| CD19 <sup>+</sup> vs CD8 <sup>+</sup> naive                                                | MWW-test | 0.8499  | 13.15  | 10.6   | 0.9195 |
| CD19 <sup>+</sup> vs Non classical                                                         | MWW-test | 0.1426  | 13.15  | 0      | 0.2413 |
| CD19 <sup>+</sup> vs CD8 <sup>+</sup> T <sub>CM</sub>                                      | MWW-test | 0.0239  | 13.15  | 0      | 0.0717 |
| CD19 <sup>+</sup> vs CD8 <sup>+</sup> T <sub>EM</sub>                                      | MWW-test | 0.0213  | 13.15  | 0      | 0.0717 |
| CD19 <sup>+</sup> CD5 <sup>+</sup> vs CD19 <sup>+</sup> CD5 <sup>+</sup> CD23 <sup>+</sup> | MWW-test | 0.5678  | 27.05  | 13.1   | 0.7089 |
| CD19 <sup>+</sup> CD5 <sup>+</sup> vs CD8 <sup>+</sup>                                     | MWW-test | 0.0100  | 27.05  | 0      | 0.0494 |
| CD19 <sup>+</sup> CD5 <sup>+</sup> vs Classical                                            | MWW-test | 0.0036  | 27.05  | 0      | 0.0343 |
| CD19 <sup>+</sup> CD5 <sup>+</sup> vs M-MDSC                                               | MWW-test | 0.7910  | 27.05  | 13.41  | 0.8701 |
| CD19 <sup>+</sup> CD5 <sup>+</sup> vs CD8 <sup>+</sup> naive                               | MWW-test | 0.2567  | 27.05  | 10.6   | 0.3764 |
| CD19 <sup>+</sup> CD5 <sup>+</sup> vs Non classical                                        | MWW-test | 0.0350  | 27.05  | 0      | 0.0873 |
| CD19 <sup>+</sup> CD5 <sup>+</sup> vs CD8 <sup>+</sup> T <sub>CM</sub>                     | MWW-test | 0.0079  | 27.05  | 0      | 0.0476 |
| CD19 <sup>+</sup> CD5 <sup>+</sup> vs CD8 <sup>+</sup> T <sub>EM</sub>                     | MWW-test | 0.0063  | 27.05  | 0      | 0.0476 |
| CD19 <sup>+</sup> CD5 <sup>+</sup> CD23 <sup>+</sup> vs CD8 <sup>+</sup>                   | MWW-test | 0.1476  | 13.1   | 0      | 0.2435 |
| CD19 <sup>+</sup> CD5 <sup>+</sup> CD23 <sup>+</sup> vs Classical                          | MWW-test | 0.0371  | 13.1   | 0      | 0.0875 |
| CD19 <sup>+</sup> CD5 <sup>+</sup> CD23 <sup>+</sup> vs Intermediate                       | MWW-test | 0.2312  | 13.1   | 44     | 0.3469 |
| CD19 <sup>+</sup> CD5 <sup>+</sup> CD23 <sup>+</sup> vs M-MDSC                             | MWW-test | 0.7886  | 13.1   | 13.41  | 0.8701 |
| CD19 <sup>+</sup> CD5 <sup>+</sup> CD23 <sup>+</sup> vs CD8 <sup>+</sup> naive             | MWW-test | 0.9696  | 13.1   | 10.6   | 0.9845 |
| CD19 <sup>+</sup> CD5 <sup>+</sup> CD23 <sup>+</sup> vs Non classical                      | MWW-test | 0.1996  | 13.1   | 0      | 0.3137 |
| CD19 <sup>+</sup> CD5 <sup>+</sup> CD23 <sup>+</sup> vs Foxp3 <sup>+</sup> Treg            | MWW-test | 0.0521  | 13.1   | 65.65  | 0.1067 |
| CD19 <sup>+</sup> CD5 <sup>+</sup> CD23 <sup>+</sup> vs CD8 <sup>+</sup> T <sub>CM</sub>   | MWW-test | 0.1258  | 13.1   | 0      | 0.2185 |
| CD19 <sup>+</sup> CD5 <sup>+</sup> CD23 <sup>+</sup> vs CD8 <sup>+</sup> T <sub>EM</sub>   | MWW-test | 0.0803  | 13.1   | 0      | 0.1472 |
| CD8 <sup>+</sup> vs Classical                                                              | MWW-test | 0.3305  | 0      | 0      | 0.4544 |
| CD8 <sup>+</sup> vs Intermediate                                                           | MWW-test | 0.0292  | 0      | 44     | 0.0803 |
| CD8 <sup>+</sup> vs M-MDSC                                                                 | MWW-test | 0.0433  | 0      | 13.41  | 0.0952 |
| CD8 <sup>+</sup> vs CD8 <sup>+</sup> naive                                                 | MWW-test | 0.0235  | 0      | 10.6   | 0.0717 |
| CD8 <sup>+</sup> vs Non classical                                                          | MWW-test | 0.9257  | 0      | 0      | 0.9698 |
| CD8 <sup>+</sup> vs Foxp3 <sup>+</sup> Treg                                                | MWW-test | 0.0030  | 0      | 65.65  | 0.0330 |

Abbreviations and notes: Cell depletion data were tested for normality using a Shapiro-Wilk normality test. ExprA/B: median, respectively mean, according to the normality of the distribution of the data. t-test was applied to normally distributed data, otherwise the Mann-Whitney-Wilcoxon (MWW) test.

## Supplementary Table S12. Comparisons between human myeloid and lymphoid cells in depletion studies

| Comparison A vs B                                                    | Method   | p-value | Expr A | Expr B | FDR    |
|----------------------------------------------------------------------|----------|---------|--------|--------|--------|
| CD8 <sup>+</sup> vs CD8 <sup>+</sup> T <sub>CM</sub>                 | MWW-test | 1.0000  | 0      | 0      | 1.0000 |
| CD8 <sup>+</sup> vs CD8 <sup>+</sup> T <sub>EM</sub>                 | MWW-test | 0.6548  | 0      | 0      | 0.7840 |
| Classical vs Intermediate                                            | MWW-test | 0.0105  | 0      | 44     | 0.0494 |
| Classical vs M-MDSC                                                  | MWW-test | 0.0072  | 0      | 13.41  | 0.0476 |
| Classical vs CD8+naive                                               | MWW-test | 0.0028  | 0      | 10.6   | 0.0330 |
| Classical vs Non classical                                           | MWW-test | 0.3870  | 0      | 0      | 0.5109 |
| Classical vs Foxp3 <sup>+</sup> Treg                                 | MWW-test | 0.0009  | 0      | 65.65  | 0.0330 |
| Classical vs CD8 <sup>+</sup> T <sub>CM</sub>                        | MWW-test | 0.3305  | 0      | 0      | 0.4544 |
| Classical vs CD8 <sup>+</sup> T <sub>EM</sub>                        | MWW-test | 0.6704  | 0      | 0      | 0.7840 |
| Intermediate vs M-MDSC                                               | MWW-test | 0.3410  | 44     | 13.41  | 0.4594 |
| Intermediate vs CD8 <sup>+</sup> naive                               | MWW-test | 0.2881  | 44     | 10.6   | 0.4134 |
| Intermediate vs Non classical                                        | MWW-test | 0.0357  | 44     | 0      | 0.0873 |
| Intermediate vs CD8 <sup>+</sup> T <sub>CM</sub>                     | MWW-test | 0.0292  | 44     | 0      | 0.0803 |
| Intermediate vs CD8 <sup>+</sup> T <sub>EM</sub>                     | MWW-test | 0.0184  | 44     | 0      | 0.0701 |
| M-MDSC vs CD8 <sup>+</sup> naive                                     | MWW-test | 0.6771  | 13.41  | 10.6   | 0.7840 |
| M-MDSC vs Non classical                                              | MWW-test | 0.0746  | 13.41  | 0      | 0.1406 |
| M-MDSC vs Foxp3+Treg                                                 | MWW-test | 0.0636  | 13.41  | 65.65  | 0.1235 |
| M-MDSC vs CD8+T <sub>CM</sub>                                        | MWW-test | 0.0239  | 13.41  | 0      | 0.0717 |
| M-MDSC vs CD8+T <sub>EM</sub>                                        | MWW-test | 0.0138  | 13.41  | 0      | 0.0568 |
| CD8 <sup>+</sup> naive vs Non classical                              | MWW-test | 0.0858  | 10.6   | 0      | 0.1530 |
| CD8 <sup>+</sup> naive vs Foxp3 <sup>+</sup> Treg                    | MWW-test | 0.0342  | 10.6   | 65.65  | 0.0873 |
| CD8 <sup>+</sup> naive vs CD8 <sup>+</sup> T <sub>CM</sub>           | MWW-test | 0.0191  | 10.6   | 0      | 0.0701 |
| CD8 <sup>+</sup> naive vs CD8 <sup>+</sup> T <sub>EM</sub>           | MWW-test | 0.0079  | 10.6   | 0      | 0.0476 |
| Non classical vs Foxp3 <sup>+</sup> Treg                             | MWW-test | 0.0030  | 0      | 65.65  | 0.0330 |
| Non classical vs CD8 <sup>+</sup> T <sub>CM</sub>                    | MWW-test | 0.9257  | 0      | 0      | 0.9698 |
| Non classical vs CD8 <sup>+</sup> T <sub>EM</sub>                    | MWW-test | 0.6548  | 0      | 0      | 0.7840 |
| Foxp3 <sup>+</sup> Treg vs CD8 <sup>+</sup> T <sub>CM</sub>          | MWW-test | 0.0023  | 65.65  | 0      | 0.0330 |
| Foxp3 <sup>+</sup> Treg vs CD8 <sup>+</sup> T <sub>EM</sub>          | MWW-test | 0.0017  | 65.65  | 0      | 0.0330 |
| CD8 <sup>+</sup> T <sub>CM</sub> vs CD8 <sup>+</sup> T <sub>EM</sub> | MWW-test | 0.7281  | 0      | 0      | 0.8285 |

Abbreviations and notes: Cell depletion data were tested for normality using a Shapiro-Wilk normality test. ExprA/B: median, respectively mean, according to the normality of the distribution of the data. t-test was applied to normally distributed data, otherwise the Mann-Whitney-Wilcoxon (MWW) test.
